# Supplementary material
Source: Springer Nature journal article supplement (https://www.springermedizin.de/resource/supplementary/12967_2011_841_MOESM2_ESM.pdf/9577180)
Supplement: MOESM2 [file 9577180]

*99mTc-HMPAO-ADScells*

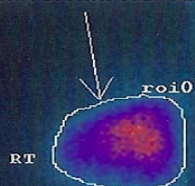

**A**

30MIN  
ANTERIOR

*99mTcO4-ADScells*

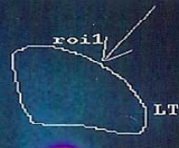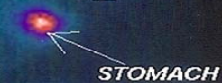

**B**

aver. count: 93.69

*99mTc-HMPAO-ADScells*

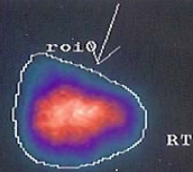

30MIN  
POSTERIOR

aver. count: 334.65

*99mTcO4-ADScells*

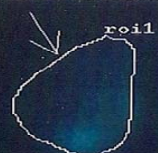

**D**

aver. count: 37.89

*99mTc-HMPAO-ADScells*

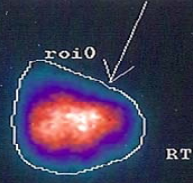

90MIN  
POSTERIOR

aver. count: 227.24

*99mTcO4-ADScells*

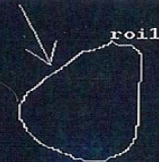

**F**

aver. count: 1.22

*99mTc-HMPAO-ADScells*

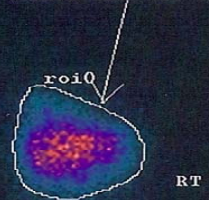

24HOURS  
POSTERIOR

aver. count: 14.76

**C**

90MIN  
ANTERIOR

30MIN  
ANTERIOR

STOMACH

**E**

24HOURS  
ANTERIOR

STOMACH
